# Supplementary material for: Enhanced thermal conductivity in immiscible polyimide blend composites with needle-shaped ZnO particles
Source: Royal Society of Chemistry journal article supplement (doi:10.1039/c7ra00760d), 2017-01-01
Supplement: c7ra00760d1.pdf [file c7ra00760d1.pdf]

## Supporting Information:

### Enhanced Thermal Conductivity in Immiscible Polyimide Blend Composites with Needle-Shaped ZnO Particles

Shoya UCHIDA<sup>1</sup>, Tomoya MURAKAMI<sup>1</sup>, Takeru IWAMURA<sup>2</sup>,  
Ryohei ISHIGE<sup>1</sup> and Shinji ANDO<sup>1\*</sup>

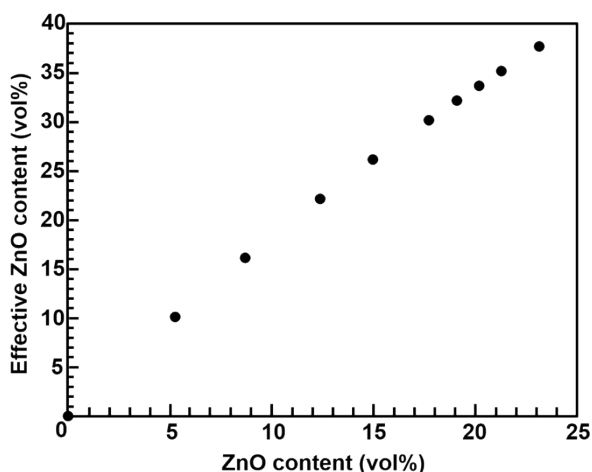

**Figure S1** Relation between the loaded ZnO content and the effective ZnO content in PI blend composite films. The dual-phase VDP structure shown in Fig. 1 (the molar ratio of TF and SD phases is 1:1) is assumed to estimate the effective ZnO content.

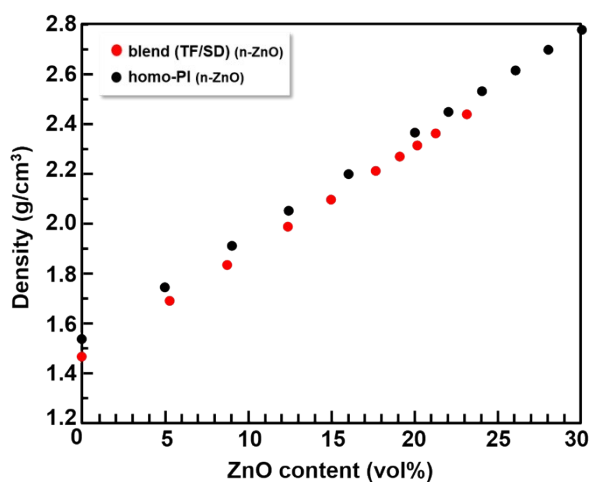

**Figure S2** Weight density of homo-PI and PI blend composite films calculated based on Eq. 2 as a function of ZnO content.

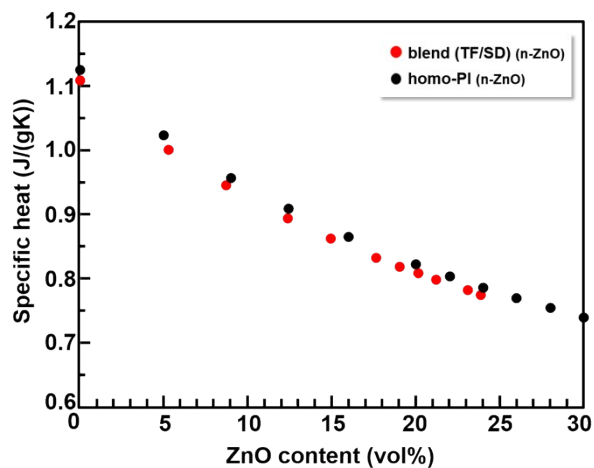

**Figure S3** Specific heats of homo-PI and PI blend composite films calculated based on Eq. 3 with various n-ZnO contents.

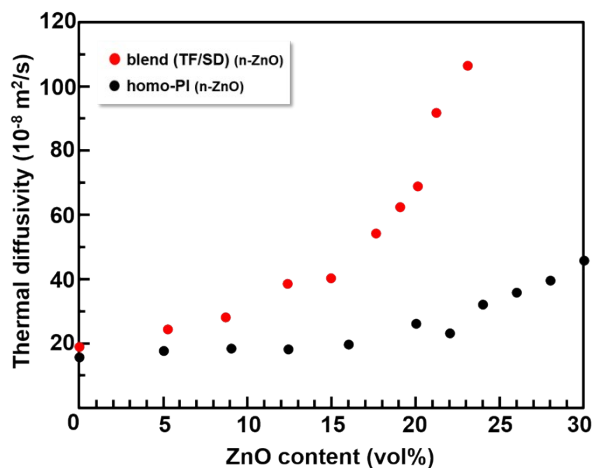

**Figure S4** Experimental thermal diffusivity of homo-PI and PI blend composite films with various n-ZnO contents.

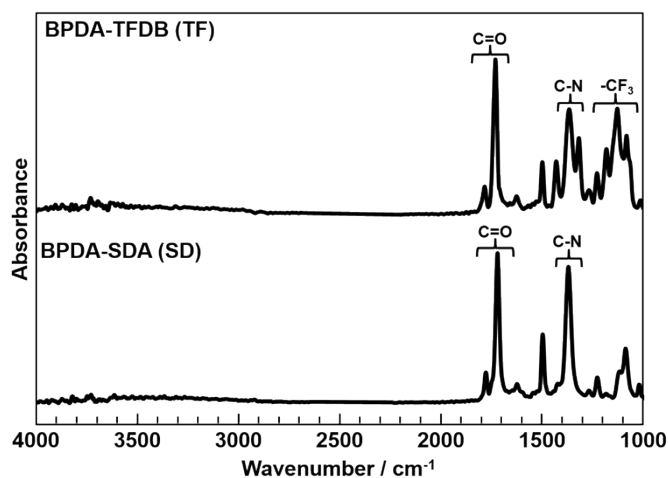

**Figure S5** ATR FT-IR spectra of SD and TF homo-PI films cured at 350 °C.

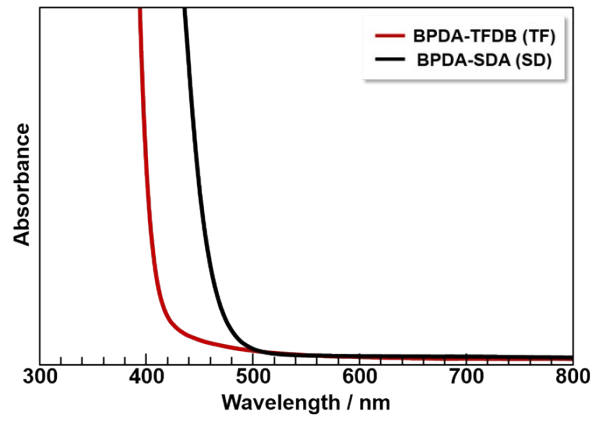

**Figure S6** UV-Vis absorption spectra of SD and TF films cured at 350 °C. UV-vis absorption spectra of the films were acquired with Hitachi U-3500 spectrophotometer.

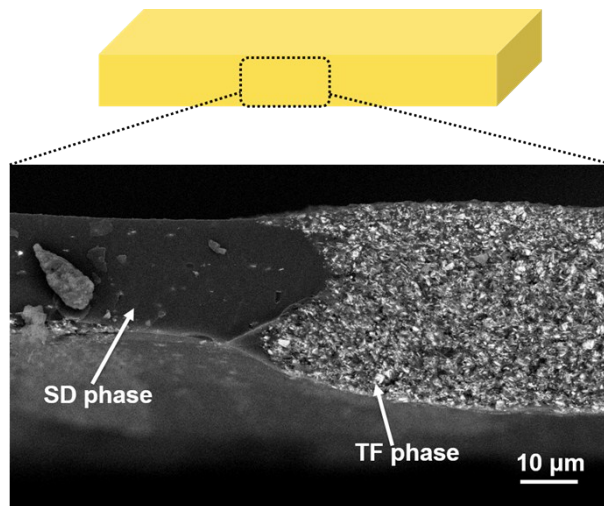

**Figure S7** Magnified cross-sectional FE-SEM image of VDP structure (filler content : 21 vol%).

**Table S1** n-ZnO content in the composite films  $\phi_p$ , effective n-ZnO content in the composite films  $\phi_{ep}$ , thermal conductivity  $\lambda$ , density  $\rho$ , specific heat  $C_p$ , and thermal diffusivity  $D_{\perp}$  of n-ZnO/PI composite films.

| Composite Films | $\phi_p$<br>[vol%] | $\phi_{ep}$<br>[vol%] | $\lambda$<br>[W/(mK)] | $\rho$<br>[g/cm <sup>3</sup> ] | $C_p$<br>[J/g·K] | $D_{\perp}$<br>[10 <sup>-8</sup> m <sup>2</sup> /s] |
|-----------------|--------------------|-----------------------|-----------------------|--------------------------------|------------------|-----------------------------------------------------|
| homo-PI-0       | 0                  | 0                     | 0.26                  | 1.53                           | 1.13             | 15.3                                                |
| homo-PI-5       | 5                  | 5                     | 0.31                  | 1.74                           | 1.02             | 17.2                                                |
| homo-PI-9       | 9                  | 9                     | 0.33                  | 1.90                           | 0.96             | 18.0                                                |
| homo-PI-12      | 12.4               | 12.4                  | 0.33                  | 2.04                           | 0.91             | 17.8                                                |
| homo-PI-16      | 16                 | 16                    | 0.37                  | 2.19                           | 0.87             | 19.3                                                |
| homo-PI-20      | 20                 | 20                    | 0.50                  | 2.44                           | 0.82             | 25.7                                                |
| homo-PI-22      | 22                 | 22                    | 0.45                  | 2.36                           | 0.80             | 22.7                                                |
| homo-PI-24      | 24                 | 24                    | 0.62                  | 2.53                           | 0.79             | 31.4                                                |
| homo-PI-26      | 26                 | 26                    | 0.71                  | 2.61                           | 0.77             | 35.2                                                |
| homo-PI-28      | 28                 | 28                    | 0.79                  | 2.69                           | 0.76             | 38.9                                                |
| homo-PI-30      | 30                 | 30                    | 0.93                  | 2.78                           | 0.74             | 45.1                                                |
| blend-0         | 0                  | 0                     | 0.30                  | 1.46                           | 1.11             | 18.5                                                |
| blend-5         | 5.3                | 10                    | 0.40                  | 1.68                           | 1.00             | 24.0                                                |
| blend-9         | 8.7                | 16                    | 0.47                  | 1.82                           | 0.95             | 27.6                                                |
| blend-12        | 12.4               | 22                    | 0.67                  | 1.98                           | 0.89             | 37.9                                                |
| blend-15        | 14.9               | 26                    | 0.72                  | 2.09                           | 0.86             | 39.7                                                |
| blend-18        | 17.6               | 30                    | 0.98                  | 2.20                           | 0.83             | 53.4                                                |
| blend-19        | 19.0               | 33                    | 1.13                  | 2.26                           | 0.82             | 61.4                                                |
| blend-20        | 20.1               | 33.5                  | 1.27                  | 2.31                           | 0.81             | 67.9                                                |
| blend-21        | 21.2               | 35                    | 1.70                  | 2.36                           | 0.80             | 90.5                                                |
| blend-23        | 23.1               | 37.5                  | 2.00                  | 2.43                           | 0.78             | 105                                                 |
